# Supplementary material
Source: PubMed Central journal article supplement (PMC2852951)
Supplement: supp_M109.075721_Supplinformation.pdf [file supp_M109.075721_Supplinformation.pdf]

## SUPPLEMENTARY INFORMATION

**Supplementary Table 1: List of primers used in this study**

| Primer Name                            | Sequence                                |
|----------------------------------------|-----------------------------------------|
| <b>DhNIK1 cloning</b>                  |                                         |
| Dnik1F-BamH1                           | 5' CCGGATCCGTGTCGCATACTCATCC 3'         |
| DnikP-Nco1R                            | 5' CATGCCATGGTCAACGCTTGAATCAA 3'        |
| Dnik-Nco1F                             | 5' CATGCCATGGGTACACCCGAATTAATGAA 3'     |
| Dnik-Xho1R                             | 5' CCGCTCGAGTCAATCAAGATATTCAATCCTTGG 3' |
| DnikR Xho1-GFP                         | 5' CCGCTCGAGAATCAAGATATTCAATCCTTGGGA 3' |
| <b>H500Q mutation</b>                  |                                         |
| DnikH500QF1                            | 5'CAAATATGTCCCAAGAGATTAGGACACCTT 3'     |
| DnikH500QR1                            | 5' TCCTAATCTCTTGGGACATATTTGCCAAAA 3'    |
| HAMPR-EcoR1                            | 5' ACAGAATTCCAATAATAACCTTTCCTTG 3'      |
| <b>D915R mutation</b>                  |                                         |
| Dnik D915N F1                          | 5' GTTTAAATGAATGTACAAATGCCTGTAATG 3'    |
| Dnik D915N R1                          | 5' GCATTTGTACATTCATTAACAACATCGT 3'      |
| DNik1 F 2 -EcoR1                       | 5'TTGGAAATTCTGTGTCAGTGATACT 3'          |
| <b>H13452 construct</b>                |                                         |
| 1CR                                    | 5' CTTCGATACTTCGTTTGCAAATGCTTGCAA3'     |
| 1CF                                    | 5' GCATTTGCAAACGAAGTATCGAAGGTTGCT3'     |
| 5BR                                    | 5' TTTTGTCACTTCTTGAATAGATTCTCTTAA3'     |
| 5BF                                    | 5' GAATCTATTCAAGAAGTGACAAAAGTTGCG3'     |
| 2fR                                    | 5' AGCGGTGTTTCTAAAGGCAAATGTTCTTAA3'     |
| 2fF                                    | 5' ACATTTGCCTTTAGAAACACCGCTGCAAGG3'     |
| <b>H12435 construct</b>                |                                         |
| C4 rev                                 | 5' AGTTAAATTAGTAGCCATAGCATTTACATT3'     |
| C4 for                                 | 5' AATGCTATGGCTACTAATTTAACTAATCAA3'     |
| E3 rev                                 | 5' CGTCAAATTAAGAGCCATAGTGTTGACATT3'     |
| E3for                                  | 5' AACACTATGGCTCTTAATTTGACGACCCAA3'     |
| D5rev                                  | 5' CGTTAAATTAGAAGCCATAAGATTAACATT3'     |
| D5for                                  | 5' AATCTTATGGCTTCTAATTTAACGTCGCAA3'     |
| <b>Individual HAMP domain deletion</b> |                                         |

ΔH1delF 5' TCGGCCAATAAGGAAGTGACAAAAGTTGCGACTGAA 3'  
 ΔH1delR 5' TTTTGTCACTTCCTTATTGGCCGACTTGGAGGTATC 3'  
 ΔH2delF 5' AACATTATGGCCGAAGTATCGAAGGTTGCTAGAGAT 3'  
 ΔH2delR 5' CTTCGATACTTCGGCCATAATGTTAACATTATCAGT 3'  
 ΔH3delF 5' AATGCTATGGCTGAAGTTACTACATTATCCCGTGAA 3'  
 ΔH3delR 5' TGTAGTAACTTCAGCCATAGCATTACATTATCTGT 3'  
 ΔH4delF 5' AATCTTATGGCTGAAGTGTCAAAGGTCGCAAGAGAT 3'  
 ΔH4delR 5' CTTTGACACTTCAGCCATAAGATTAACATTCTCTGT 3'  
 ΔH5delF 5' AACACTATGGCTAGAAACACCGCTGCAAGGGAAGCT 3'  
 ΔH5delR 5' AGCGGTGTTTCTAGCCATAGTGTTGACATTACTGGT 3'

### For serial HAMP domain deletions

ΔH1-2delF 5' TCGGCCAATAAGGAAGTATCGAAGGTTGCTAGAGAT 3'  
 ΔH1-2delR 5' CTTCGATACTTCCTTATTGGCCGACTTGGAGGTATC 3'  
 ΔH1-3delF 5' TCGGCCAATAAGGAAGTTACTACATTATCCCGTGAA 3'  
 ΔH1-3delR 5' TGTAGTAACTTCCTTATTGGCCGACTTGGAGGTATC 3'  
 ΔH1-4delF 5' TCGGCCAATAAGGAAGTGTCAAAGGTCGCAAGAGAT 3'  
 ΔH1-4delR 5' CTTTGACACTTCCTTATTGGCCGACTTGGAGGTATC 3'  
 ΔH1-5delF 5' TCGGCCAATAAGAGAAACACCGCTGCAAGGGAAGCT 3'  
 ΔH1-5delR 5' AGCGGTGTTTCTCTTATTGGCCGACTTGGAGGTATC 3'

### Two hybrid cloning

HAMP1\_twF 5' CGGAATTCATGGGTACACCCGAATTAA 3'  
 HAMP1\_twR 5' CCGCTCGAGTTAGTTTGCAAATGCTTGCAA 3'  
 HAMP2\_twF 5' CGGAATTCGAAGTGACAAAAGTTGCGA 3'  
 HAMP2\_twR 5' CCGCTCGAGTTAAAAGGCAAATGTTCTTAACT 3'  
 HAMP3\_twF 5' CGGAATTCGAAGTATCGAAGGTTGCTAG 3'  
 HAMP3\_twR 5' CCGCTCGAGTTACAATGCAAAATTCTGTAATC 3'  
 HAMP4\_twF 5' CGGAATTCGAAGTTACTACATTATCCCG 3'  
 HAMP4\_twR 5' CCGCTCGAGTTATGATGCGAAAAGTTGTAAA 3'  
 HAMP5\_twF 5' CGGAATTCGAAGTGTCAAAGGTCGCA 3'  
 HAMP5\_twR 5' CCGCTCGAGTTATTGAATAGATTCTCTTAAATTCA 3'

### HA-tagging

DNIK1\_ORF\_R\_2HA  
 5'CCGCTCGAGTTATGCATAGTCCGGGACGTCATACGGATAGCCCGCAT  
 AGTCAGGAACATCGTATGGGTAATCAAGATATTCAATCCTTGGAGAA 3'

### His-tagged protein

DNik1R-XhoI 5'CCGCTCGAGTGCATCAAGATATTCAATCCTT 3'

**Supplementary Table 2: Amino acid sequences of the individual HAMP domains from *NIK1* orthologs from different yeast and fungi**

| Name                             | Sequence                                                 |
|----------------------------------|----------------------------------------------------------|
| <i>Yarrowia lipolytica</i>       |                                                          |
| YL5H1                            | RAFQKALMEIGEVVFAVAQGDLSKKVTIHDQEMDPEIVKFKETINKMMSQLQRFAS |
| YL5H2                            | SNLTDQVREIADVTRAVAQGDLSRKINVHAQQEILELQKTINTMVEQLRRTFAF   |
| YL5H3                            | SNLTDQVRNIANVTTAVARGDLSQKVSADCKGEILDKSTINKMVDRLQNFAL     |
| YL5H4                            | SNLTTQVRSIAHVTTAVAQGDLSQKIDVHAQGEMLALKSTINKMVDRLQVFAS    |
| YL5H5                            | ANLTTQVRALVQITAAATDGDFTFRFITVEASGEMDALKTKINQMVLNLRRESIQ  |
| <i>Lodderomyces elongisporus</i> |                                                          |
| LE5H1                            | KAFKQALSEIGTVVISVAMGDLSKKVEIHTVESDPEILKVKITINTMMDQLQTFAS |
| LE5H2                            | SNLTDQVREIADVTRAVARGDLSRKINVHAQQEILQLQMTINTMVDQLRRTFAF   |
| LE5H3                            | LNLTTQVRNIANVTTAVAKGDLSKKVTADCKGEILNLKLTINQMVDRLKLFAS    |
| LE5H4                            | TNLTDQVRSIATVTTAVAHGDLSQKIDVHAQQEILQLKNTINKMVDLSLQFAS    |
| LE5H5                            | SNLTSQVRAFAQITAAATDGDFTFRFITVEALGEMDALKTKINQMVLNLRRESIQ  |
| <i>Pichia stipitis</i>           |                                                          |
| PS5H1                            | KAFKQALSEIGTVVISVAMGDLSKKVEIHTVESDPEILKVKITINTMMDQLQAFAN |
| PS5H2                            | LNLTDQVREIADVTRAVARGDLSRKINVHAQQEILQLQMTINTMVDQLRRTFAF   |
| PS5H3                            | LNLTTQVRNIANVTTAVAKGDLSKKVTADCKGEILNLKLTINQMVDRLQNFAL    |
| PS5H4                            | TNLTDQVRSIATVTTAVAHGDLSQKIDVHAQQEILQLKNTINKMVDLSLQFAS    |
| PS5H5                            | SNLTSQVRAFAQITAAATDGDFTFRFITVEASGEMDALKTKINQMVLNLRRESIQ  |
| <i>Debaryomyces hansenii</i>     |                                                          |
| DH5H1                            | KAFKQALSEIGTVVISVAMGDLSKKVEIHTVESDPEILKVKITINTMMDQLQAFAN |
| DH5H2                            | LNLTDQVREIADVTRAVARGDLSRKINVHAQQEILQLQMTINSMVDQLRRTFAF   |
| DH5H3                            | LNLTTQVRNIANVTTAVAKGDLSKKVTADCKGEILDKLTINQMVDRLQNFAL     |
| DH5H4                            | TNLTDQVRSIATVTTAVAHGDLSQKIDVHAQQEILQLKNTINKMVDLSLQFAS    |
| DH5H5                            | SNLTSQVRAFAQITAAATDGDFTFRFITVEASGEMDALKTKINQMVLNLRRESIQ  |
| <i>Candida albicans</i>          |                                                          |
| CA5H1                            | KAFQQALSEIGTVVISVAMGDLSKKVEIHTVENDPEILKVKITINTMMDQLQTFAN |
| CA5H2                            | LNLTDQVREIADVTRAVAKGDLSRKINVHAQQEILQLQRTINTMVDQLRRTFAF   |
| CA5H3                            | LNLTTQVRNIANVTTAVAKGDLSKKVTADCKGEILDKLTINQMVDRLQNFAL     |
| CA5H4                            | TNLTDQVRSIATVTTAVAHGDLSQKIDVHAQQEILQLKNTINKMVDLSLQFAS    |
| CA5H5                            | SNLTSQVRAFAQITAAATDGDFTFRFITVEASGEMDALKTKINQMVFNLRESLQ   |
| <i>Botryotinia fuckeliana</i>    |                                                          |
| BF6H1                            | EAFQKALREIGEIVTAVARGDLSKKVQIHSVEMDPEITTFKRVINTMMDQLQIFSS |
| BF6H2                            | QNLTDQVREIASVTTAVAHGDLTQKIERPAQGEILQLQQTINTMVDQLRRTFAA   |
| BF6H3                            | NNLTTQVRDIAIVTTAVAKGDLTQKQVQAECKGEIKQLKETINSMVDQLQQFAR   |
| BF6H4                            | MNLTTQVREIAKVTTAVARGDLTKKIEVEVQGEIASLKDTINTMVDRLSTFAF    |
| BF6H5                            | RNLTTQVRGISTVTQAANGDMSQKIEVAAAGEILILKETINNMVDRLSIFSN     |
| BF6H6                            | NNLTTQVRAFGDITNAATDGDFTKLITVEASGEMDELKRKINQMVMVYNLRDSIQ  |
| <i>Gibberella moniliformis</i>   |                                                          |
| GM6H1                            | EAFQKALREIGEIVTAVARGDLTMKVRMNTVEMDPEITTFKRTINAMMDQLQIFAS |
| GM6H2                            | KELTDNVREIASVTTAVAHGDLTKKIERPARGEILQLQQTINTMVDQLRRTFAS   |

GM6H3 NNLTTQVRDIHKVTTAVAKGDLTQKVQADCRGEIFELKSTINSMVDQLQQFAR  
GM6H4 MNLTTQVREIAKVTTAVAKGDLTKKIGVEVKGEIAELKNTINQMVDRLGTFAV  
GM6H5 SNLTVQVRSISTVTQAIANGDMSQKIKVEANGEIQVLKETINNMVDRLSSFCY  
GM6H6 SNLTTQVRAFSITNLAATDGDFTKLVDEASGEMDELKRKINQMISNLRDSIQ

*Neurospora crassa*

NC6H1 EAFQKALREIGEIVTAVARGDLSKKVIRMNSVEMDPEITTFKRTINTMMDQLQVFSS  
NC6H2 QNLTDQVREIASVTTAVAHGDLTKKIERPAKGEILQLQQTINTMVDQLRTFAS  
NC6H3 NNLTTQVRDIHKVTTAVAKGDLTQKVQAECRGEIFELKKTINSMVDQLQQFAR  
NC6H4 MNLTTQVREIAKVTTAVAKGDLTKKIGVEVQGEILDLKNTINTMVDRLGTFAF  
NC6H5 SNLTSQVRGISTVTQAIANGDMSRKKIEVEAKGEILILKETINNMVDRLSIFCN  
NC6H6 NNLAQVRAFGDITNAATDGDFTKLVVEASGEMDELKKKINQMVYNLRDSIQ

*Magnaporthe grisea*

MG6H1 EAFQKALREIGSIVTAAARGDLSKRVKINPIEMDPEITTFKRTMNAMMDQLGVFSS  
MG6H2 QNLTDQVREIASVTTAVAHGDLTKKIESAAKGEILQLQQTINTMVDQLRTFAS  
MG6H3 NNLTTQVRDIINVTAVAKGDLTQKVQAECRGEIFELKNTINSMVDQLQQFAR  
MG6H4 MNLTTQVREIANVTSAVAAGDLSKKIRVEVKGEILDLKNTINTMVDRLGTFAF  
MG6H5 SNLTSQVRGISTVTQAIANGDMSRKKIDVEAKGEILILKETINNMVDRLSIFCN  
MG6H6 NNLAQVRAFGDITNAATDGDFTKLVVEASGEMDELKRKINQMVYNLRDSIQ

*Aspergillus niger*

AN6H1 EAFQKALREIGGIITQVANGDLSMKVQIHPLEMDPEIATFKRTINTMMDQLQVFGS  
AN6H2 KNLTDQVREIAAVTTAVAHGDLTKKIESRAQGEILELQQTINTMVDQLRTFAT  
AN6H3 NNLTTQVRDIATVTKAVAKGDLTQKVQANCKGEIAELKNIINSMVDQLRQFAQ  
AN6H4 NNLTTQVREIADVTTAVAKGDLTKKVTANVQGEILDLKSTINGMVDRLNTFAF  
AN6H5 QNLTSQVRSISDVTQAIKAGDLSKKIEVHAQGEILTLKVTINHMVDRLAKFAT  
AN6H6 ENLTSQVRAFGDITNAATDGDFTKLITVNASGEMDELKRKINKMVSNLRDSIQ

---

## Supplementary Figure 1: CLUSTAL X sequence alignment of HAMP domains

```
BF6H1      EAFQKALREIGEIVTAVARGDLSKKVQIHSVEMDPEITTFKRVINTMMDQLQIFSS
NC6H1      EAFQKALREIGEIVTAVARGDLSKKVVRMNSVEMDPEITTFKRTINTMMDQLQVFFSS
MG6H1      EAFQKALREIGSIVTAAARGDLSKRVKINPIEMDPEITTFKRTMNAMMDQLGVFFSS
GM6H1      EAFQKALREIGEIVTAVARGDLTMKVRMNTVEMDPEITTFKRTINAMMDQLQIFAS
AN6H1      EAFQKALREIGGIITQVANGDLSMKVQIHPLEMDPEIATFKRTINTMMDQLQVFGS
YL5H1      RAFQKALMEIGEIVFAVAQGDLSKKVTIHDQEMDPEIVKFKETINKMMSQLQRFAS
PS5H1      KAFKQALSEIGTVVISVAMGDLSSKKVEIHTVESDPEILKVKITINTMMDQLQAFAN
DH5H1      KAFKQALSEIGTVVISVAMGDLSSKKVEIHTVESDPEILKVKITINTMMDQLQAFAN
LE5H1      KAFKQALSEIGTVVISVAMGDLSSKKVEIHTVESDPEILKVKITINTMMDQLQTFAS
CA5H1      KAFQQALSEIGTVVISVAMGDLSSKKVEIHTVENDPEILKVKITINTMMDQLQTFAN
LE5H4      TNLTNQVRSIATVTTAVAHGDLSSQKIDVHAQG---EILQLKNTINKMVDSLQLFAS
PS5H4      TNLTNQVRSIATVTTAVAHGDLSSQKIDVHAQG---EILQLKNTINKMVDSLQLFAS
DH5H4      TNLTNQVRSIATVTTAVAHGDLSSQKIDVHAQG---EILQLKNTINKMVDSLQLFAS
CA5H4      TNLTNQVRSIATVTTAVAHGDLSSQKIDVHAQG---EILQLKNTINKMVDSLQLFAS
YL5H4      SNLTTQVRSIAHVTTAVAQGDLSQKIDVHAQG---EMLALKSTINKMVDRLQVFFAS
PS5H2      LNLTNQVREIADVTRAVARGDLSRKINVHAQG---EILQLQMTINTMVDQLRTFAF
DH5H2      LNLTNQVREIADVTRAVARGDLSRKINVHAQG---EILQLQMTINSMVDQLRTFAF
LE5H2      SNLTNQVREIADVTRAVARGDLSRKINVHAQG---EILQLQMTINTMVDQLRTFAF
CA5H2      LNLTNQVREIADVTRAVAKGDLSSRKINVHAQG---EILQLQRTINTMVDQLRTFAF
YL5H2      SNLTNQVREIADVTRAVAQGDLSRKINVHAQG---EILELQKTINTMVEQLRTFAF
GM6H2      KELTDNVREIASVTTAVAHGDLTKKIERPARG---EILQLQQTINTMVDQLRTFAS
NC6H2      QNLTDQVREIASVTTAVAHGDLTKKIERPAKG---EILQLQQTINTMVDQLRTFAS
BF6H2      QNLTDQVREIASVTTAVAHGDLTKKIERPAQG---EILQLQQTINTMVDQLRTFAA
MG6H2      QNLTDQVREIASVTTAVAHGDLTKKIESAAKG---EILQLQQTINTMVDQLRTFAS
AN6H2      KNLTDQVREIAAVTTAVAHGDLSSQKIESRAQG---EILELQQTINTMVDQLRTFAT
DH5H3      LNLTTQVRNIANVTTAVAKGDLSSKKVTADCKG---EILDCLKTINQMVDRLQNFAL
CA5H3      LNLTTQVRNIANVTTAVAKGDLSSKKVTADCKG---EILDCLKTINQMVDRLQNFAL
PS5H3      LNLTTQVRNIANVTTAVAKGDLSSKKVTADCKG---EILNLKLTINQMVDRLQNFAL
LE5H3      LNLTTQVRNIANVTTAVAKGDLSSKKVTADCKG---EILNLKLTINQMVDRLKLFAS
YL5H3      SNLTDQVRNIANVTTAVAKGDLSSQKVSADCKG---EILDCLKSTINKMVDRLQNFAL
GM6H3      NNLTTQVRDI IKVTTAVAKGDLTKQVQAECRG---EIFELKSTINSMVDQLQQFAR
NC6H3      NNLTTQVRDI IKVTTAVAKGDLTKQVQAECRG---EIFELKKTINSMVDQLQQFAR
MG6H3      NNLTTQVRDI INVTTAVAKGDLTKQVQAECRG---EIFELKNTINSMVDQLQQFAR
BF6H3      NNLTTQVRDIAIVTTAVAKGDLTKQVQAECCKG---EIKQLKETINSMVDQLQQFAR
AN6H3      NNLTTQVRDIATVTKAVAKGDLTKQVQANCKG---EIAELKNIINSMVDQLRQFAQ
GM6H4      MNLTTQVREIAKVTTAVAKGDLTKKIGVEVKG---EIAELKNTINQMVDRLGTFAV
NC6H4      MNLTTQVREIAKVTTAVAKGDLTKKIGVEVQG---EILDCLKNTINTMVDRLGTFAF
BF6H4      MNLTTQVREIAKVTTAVARGDLTKKIEVEVQG---EIASLKDTINTMVDRLSTFAF
MG6H4      MNLTTQVREIANVTSAVAAGDLSKKIRVEVKG---EILDCLKNTINTMVDRLGTFAF
AN6H4      NNLTTQVREIADVTTAVAKGDLTKKVTANVQG---EILDCLKSTINGMVDRLNTFAF
NC6H5      SNLTSQVRGISTVTTQAIANGDMSRKIEVEAKG---EILILKETINNMVDRLSIFCN
MG6H5      SNLTSQVRGISTVTTQAIANGDMSRKIDVEAKG---EILILKETINNMVDRLSIFCN
BF6H5      RNLTTQVRGISTVTTQAIANGDMSQKIEVAAAG---EILILKETINNMVDRLSIFSN
GM6H5      SNLTVQVRSISTVTTQAIANGDMSQKIKVEANG---EIQVLKETINNMVDRLSSFCY
AN6H5      QNLTSQVRSISDVTTQAIAGDLSKKIEVHAQG---EILTLKVTINHMVDRLAKFAT
PS5H5      SNLTSQVRAFAQITAAATDGDFTRFITVEASG---EMDALKTKINQMVLNLRRESIQ
DH5H5      SNLTSQVRAFAQITAAATDGDFTRFITVEASG---EMDALKTKINQMVLNLRRESIQ
LE5H5      SNLTSQVRAFAQITAAATDGDFTRFITVEALG---EMDALKTKINQMVLNLRRESIQ
CA5H5      SNLTSQVRAFAQITAAATDGDFTRFITVEASG---EMDALKTKINQMVLNLRRESLQ
YL5H5      ANLTTQVRALVQITAAATDGDFTRFITVEASG---EMDALKTKINQMVLNLRRESIQ
NC6H6      NNLTAQVRAFGDITNAATDGDFTKLVEVEASG---EMDELKKKINQMVYNLRDSIQ
MG6H6      NNLTAQVRAFGDITNAATDGDFTKLVEVEASG---EMDELKRKINQMVYNLRDSIQ
BF6H6      NNLTTQVRAFGDITNAATDGDFTKLITVEASG---EMDELKRKINQMVYNLRDSIQ
```

```

GM6H6      SNLTTQVRAFSDITNLATDGDFTKLV DVEASG---EMDELKRKINQMISNLRDSIQ
AN6H6      ENLTSQVRAFGEITDAATDGDFTKLVNASG---EMDELKRKINKMVSNLRDSIQ
Af1503     STITRPIIELSNTADKIAEGNLEAEVPHQNRA--DEIGILAKSIERLRRSLKVAME
           :   :   :           : *::   :           *: .   :: :   *

```

**Figure S1. Comparison of individual HAMP domains from NIK1 orthologs from different yeast and filamentous fungi with Af1503 (HAMP domain sequence from *Archaeoglobus fulgidus* protein). Asterisks indicate perfectly conserved residues, two dots indicate very similar residues and full stops indicate similar residues.**
